# Supplementary material for: Comparison between dynamic versus static models and real-time monitoring of neuronal dysfunction in an amyloid-β induced neuronal toxic model on a chip platform
Source: Royal Society of Chemistry journal article supplement (doi:10.1039/d3lc00507k), 2024-01-01
Supplement: d3lc00507k1.pdf [file d3lc00507k1.pdf]

**Comparison between dynamic versus static models and real-time  
monitoring of neuronal dysfunction in amyloid- $\beta$  induced neuronal  
toxic model on a chip platform**

Chu-Chun Liang <sup>1, ‡</sup>, Po-Yen Chen <sup>2, ‡</sup>, Nien-Che Liu <sup>1</sup>, and I-Chi Lee <sup>1, \*</sup>

<sup>1</sup> Department of Biomedical Engineering and Environmental Sciences, National Tsing

Hua University, Hsinchu, 300044, Taiwan

<sup>2</sup> Department of Chemical and Biomolecular Engineering, University of Maryland,

College Park, Maryland, 20742

[‡] The authors participated equally in this work.

**\* Corresponding author: I-Chi Lee**

Mailing address: 300044 No. 101, Section 2, Kuang-Fu Road, Hsinchu, Taiwan,

R.O.C.

**E-mail:** [iclee@mx.nthu.edu.tw](mailto:iclee@mx.nthu.edu.tw)

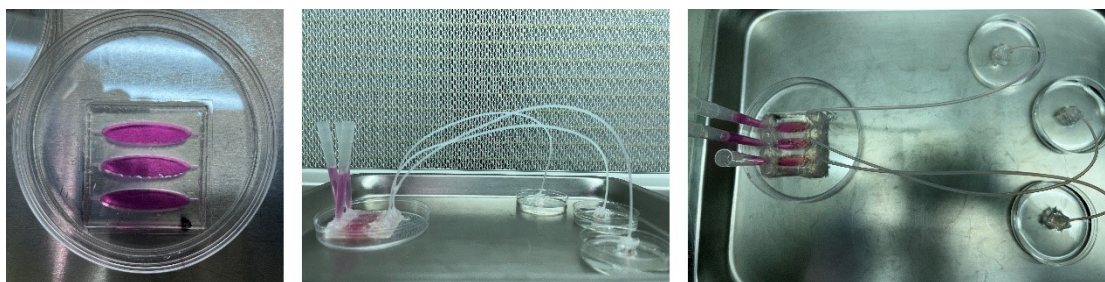

**S1.** Image of the experimental setup of osmotic micropump. The osmotic micropump was composed of patterned PDMS chambers. The dimensions of the PDMS chambers ( $10 \times 10 \times 10$  mm) with a cellulose membrane window ( $5 \times 5$  mm) were fabricated. The optimized parameters, 0.05 M PEG, PTFE tube (inner diameter, 1.0 mm; outer diameter, 1.5 mm) and 10 ml PEG, were chosen to control the flow rate within  $0.15 \sim 0.20 \mu\text{L}/\text{min}$ .

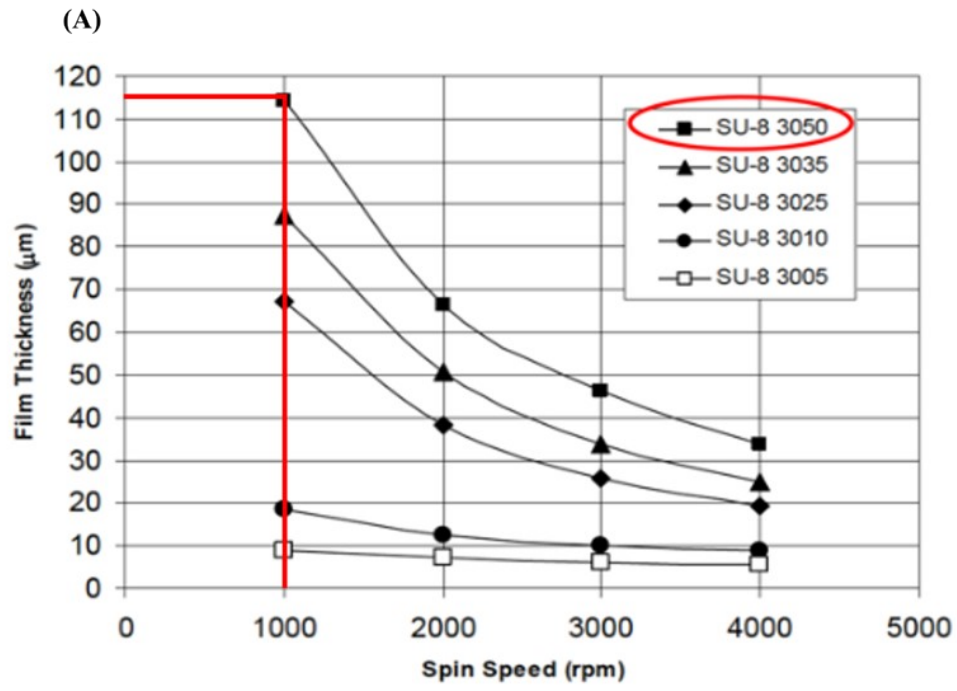

S2. (a) Thickness of different SU8 used and rotation speed.

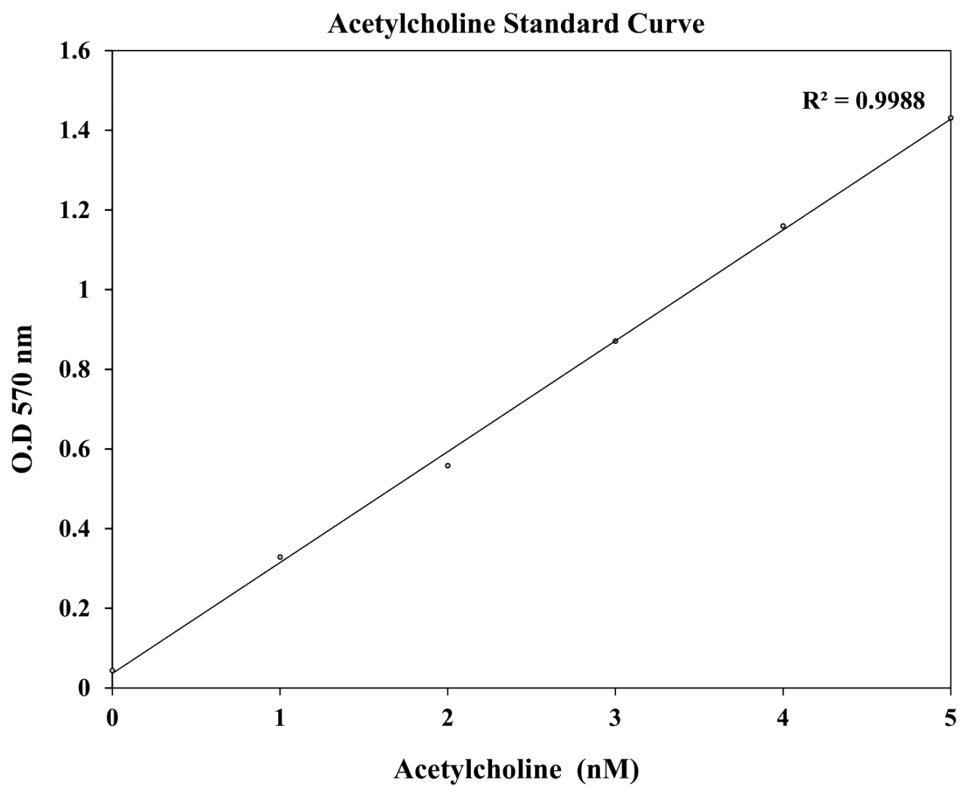

S3. Standard curve of ACh concentration versus OD value.

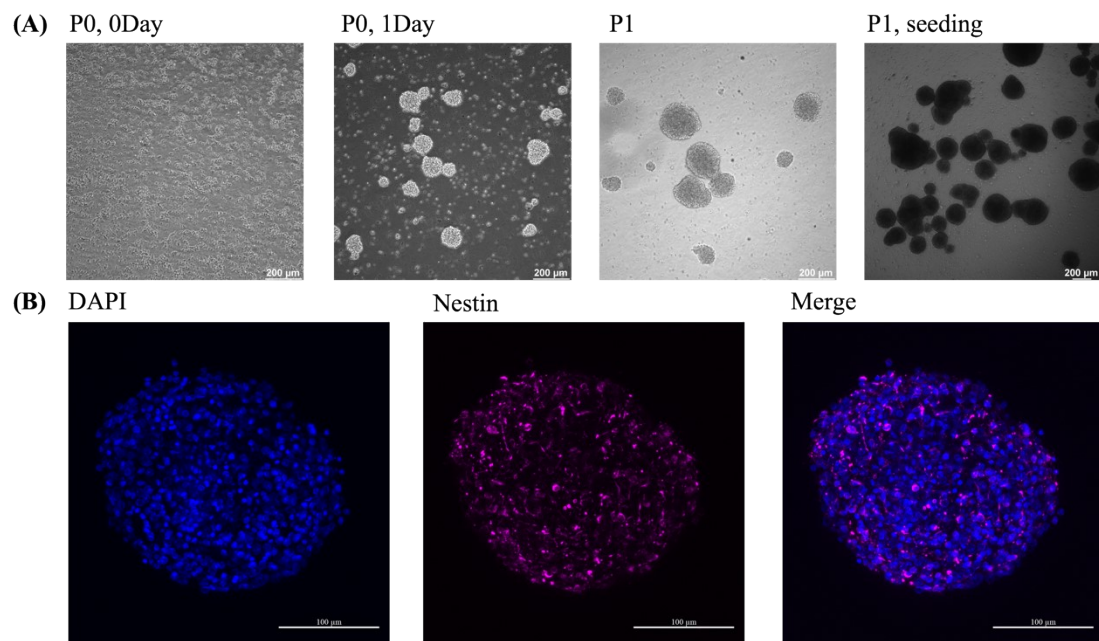

**S4.** The image of NSCs spheroid and the immunostaining of nestin. (A) Phase contrast image. (B) Nestin expression.

(A)

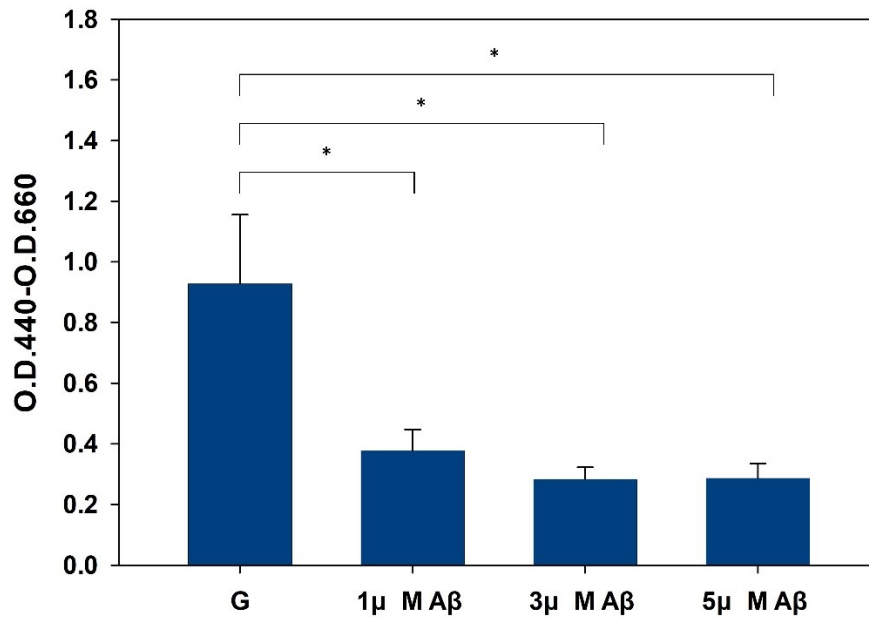

(B)

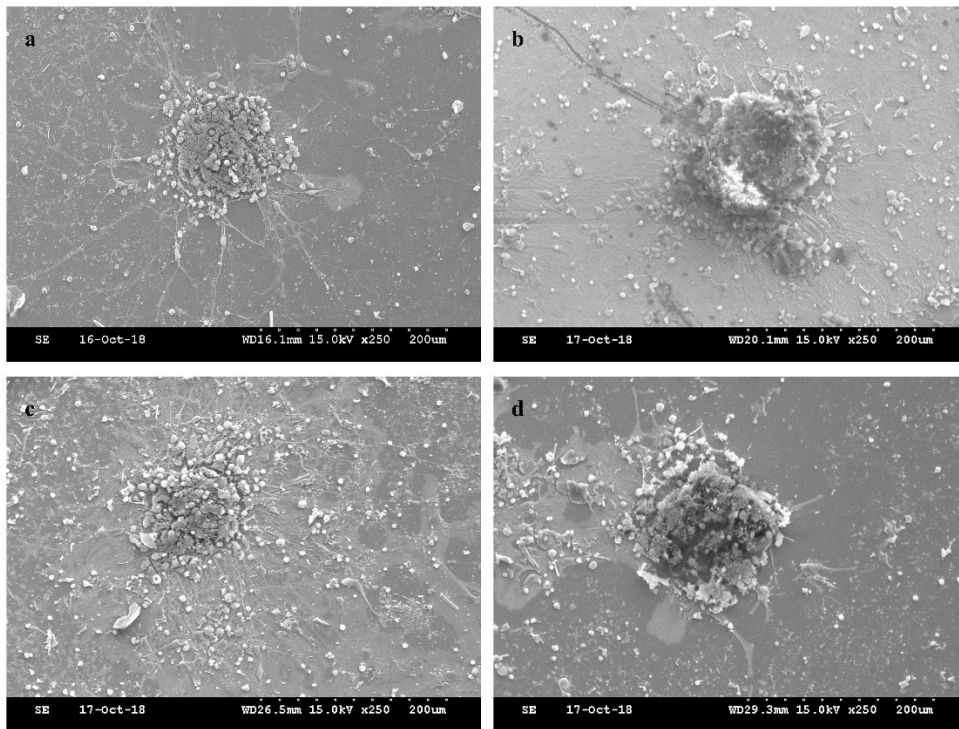

S5. (A) Cell viability assay of NSCs incubated with different concentrations of Aβ (1 μM, 3 μM and 5 μM ) for 3 days of incubation. (B) SEM morphologies of NSCs incubated with (a) 0, (b) 1 μM, (c) 3 μM and (d) 5 μM of Aβ for 3 days of incubation.

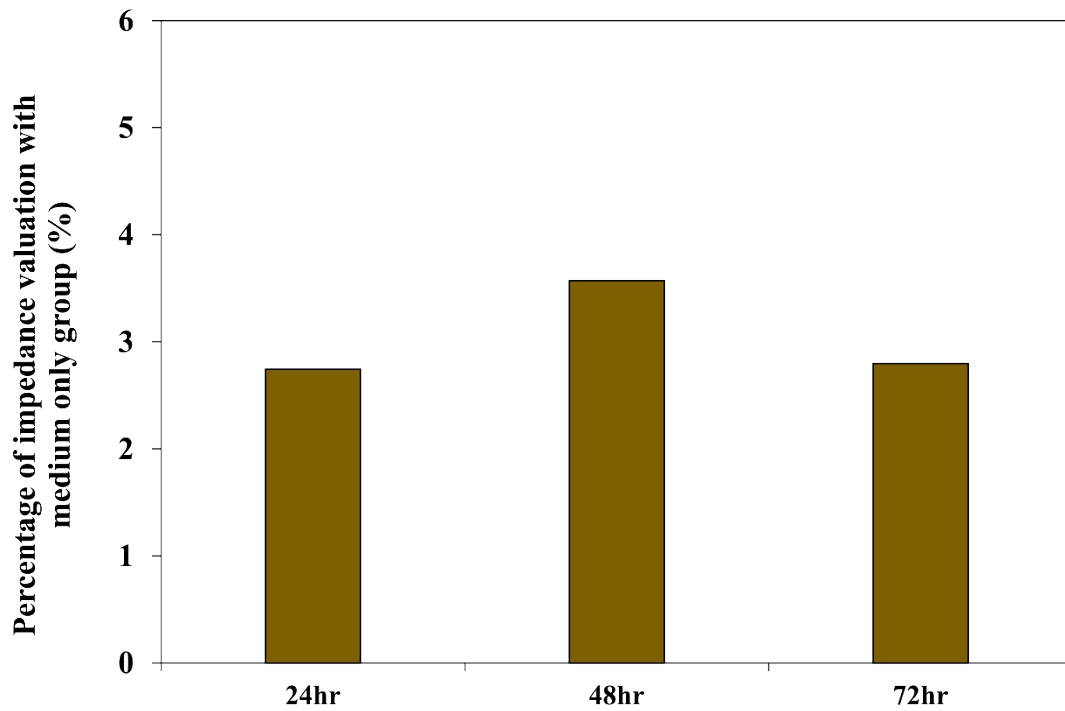

S6. The percentage variance in impedance values relative to the control group (medium only group) in response to incubation with A $\beta$  for durations of 1, 3, and 5 days at 37 °C under 5% CO<sub>2</sub> conditions.
